# Supplementary material for: Understanding the role of flux, pressure and temperature on polymorphism in ThB2O5
Source: Royal Society of Chemistry journal article supplement (doi:10.1039/d2dt01049f), 2022-01-01
Supplement: d2dt01049f1.pdf [file d2dt01049f1.pdf]

## Supporting information

### Understanding the Role of Flux, Pressure and Temperature on Polymorphism in $\text{ThB}_2\text{O}_5$

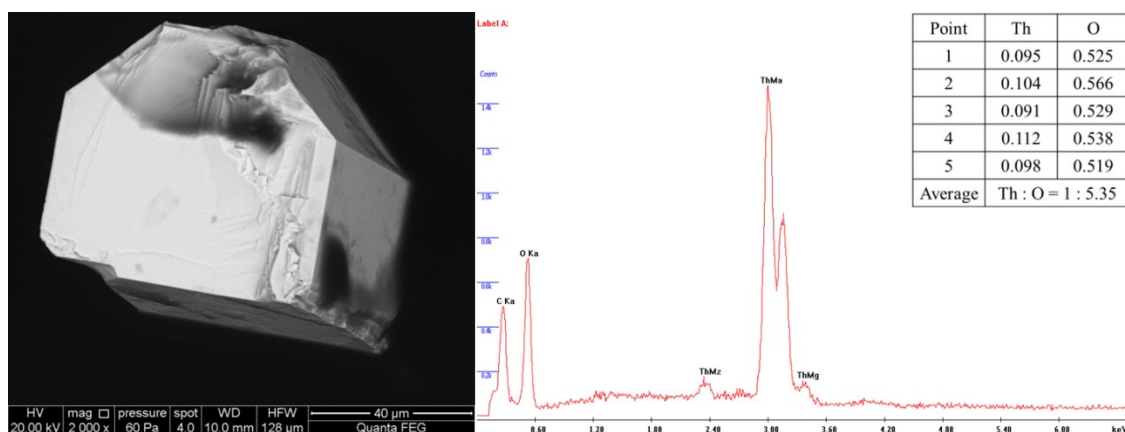

**Figure S1.** SEM image and EDS measurement for  $\beta\text{-ThB}_2\text{O}_5$

**Table S1.** Selected Important Bond Lengths (angstroms) for  $\beta$ -ThB<sub>2</sub>O<sub>5</sub>.

|              |           |              |           |
|--------------|-----------|--------------|-----------|
| Th(1)-O(3)#1 | 2.302(5)  | Th(1)-O(3)#2 | 2.302(5)  |
| Th(1)-O(2)#3 | 2.370(6)  | Th(1)-O(1)   | 2.583(6)  |
| Th(1)-O(4)#4 | 2.520(7)  | Th(1)-O(2)   | 2.514(6)  |
| Th(1)-O(3)#5 | 2.539(5)  | Th(1)-O(3)#6 | 2.539(5)  |
| Th(1)-O(3)   | 3.067(6)  | Th(1)-O(3)   | 3.067(6)  |
|              |           |              |           |
| B(1)-O(1)    | 1.472(11) | B(1)-O(3)    | 1.455(7)  |
| B(1)-O(4)    | 1.471(11) | B(1)-O(3)#7  | 1.455(7)  |
| B(2)-O(2)    | 1.356(11) | B(2) - O(1)  | 1.380(11) |
| B(2)-O(4) #3 | 1.390(11) |              |           |

Symmetry transformations used to generate equivalent atoms:  
#1 -x, -y, -z+2, #2 -x, y+1/2, -z+2, #3 x-1, y, z, #4 x+1, y, z+1, #5 x, -y+1/2, z+1, #6 x, y, z+1, #7 x, -y+1/2, z.

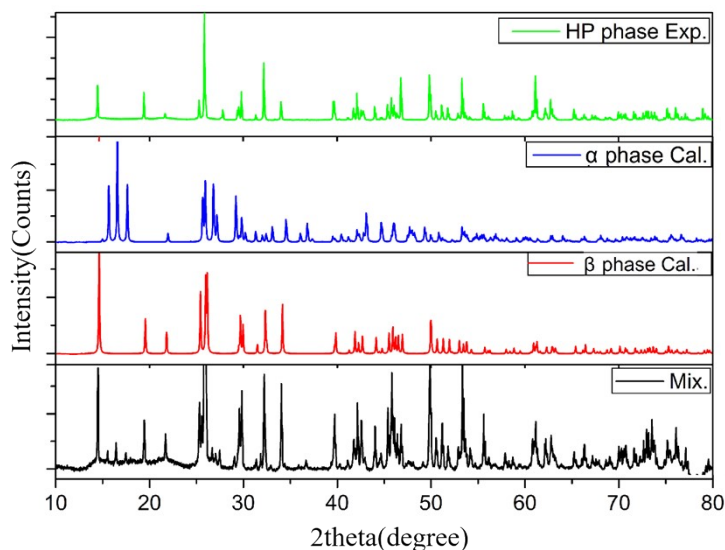**Figure S2.** PXR D patterns of High-Pressured (4GPa) phase of ThB<sub>2</sub>O<sub>5</sub>, calculated  $\alpha$ -,  $\beta$ -ThB<sub>2</sub>O<sub>5</sub> and the mixture of  $\alpha$ - and  $\beta$ -ThB<sub>2</sub>O<sub>5</sub>.

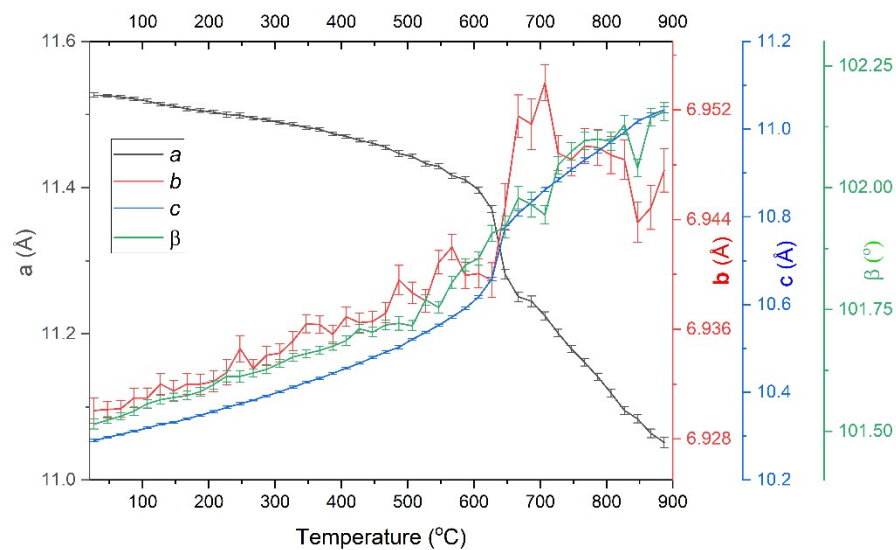

**Figure S3.** Thermal dependence of the  $a$ ,  $b$ ,  $c$  and  $\beta$  lattice parameters of  $\alpha$ -ThB<sub>2</sub>O<sub>5</sub> determined from refinements against *in situ* PXRD data using the Le Bail method.

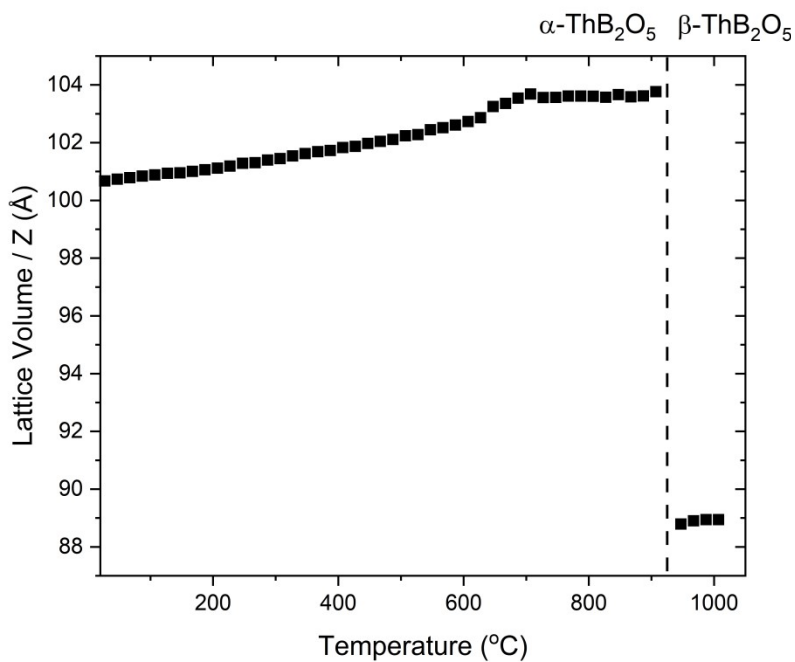

**Figure S4.** Thermal dependence of the lattice volume normalized per formula unite.

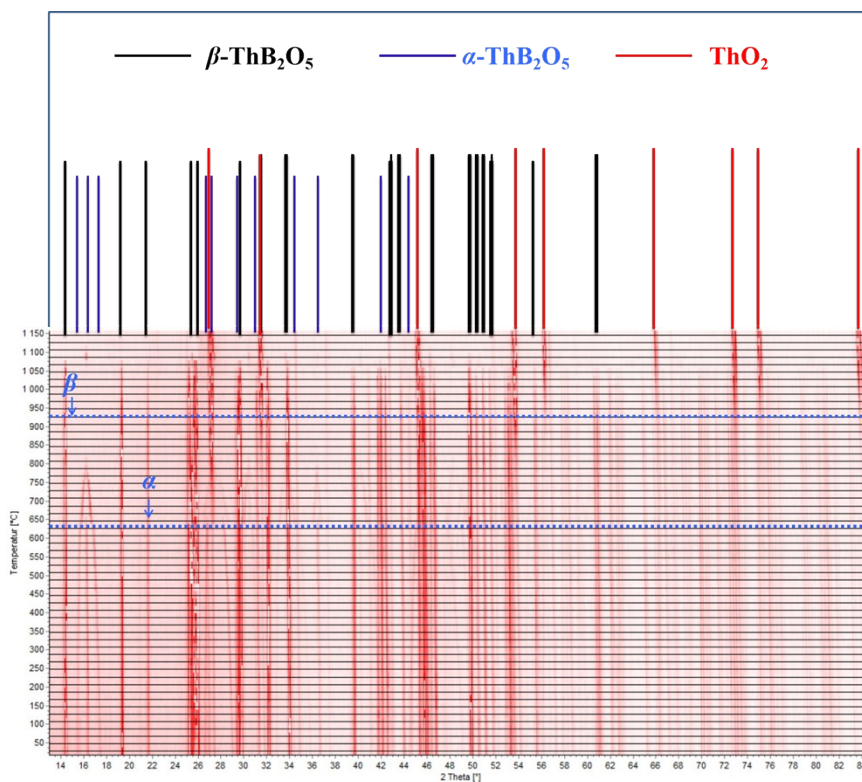

**Figure S5.** HT-PXRD pattern of a mixture of  $\alpha$ -(34 %),  $\beta$ -ThB<sub>2</sub>O<sub>5</sub> (66 %) and PXRD pattern of calculated ThO<sub>2</sub>.

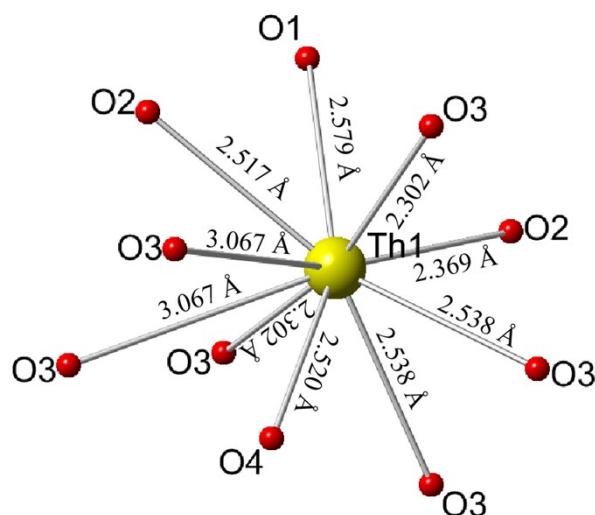

**Figure S6.** The Th-coordination environment with Th-O bond lengths in the structure of  $\beta$ -ThB<sub>2</sub>O<sub>5</sub>.

Thorium atom, B1 atom are shown in yellow and cyan, oxygen atoms in red.

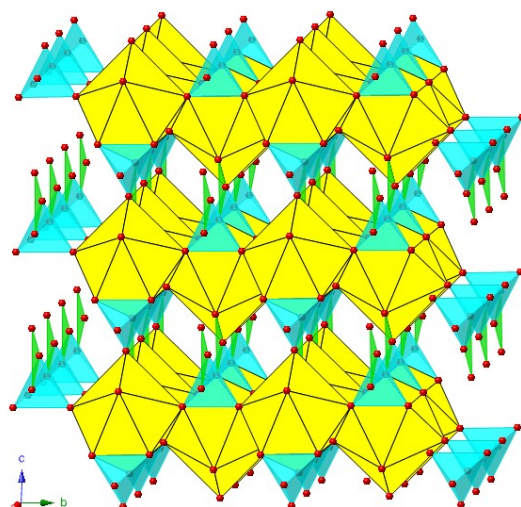

**Figure S7.** The 3D Th borate framework formed by B-O chains link the 2D Th-based sheets in  $\beta$ -ThB<sub>2</sub>O<sub>5</sub>, through corner (BO<sub>4</sub>), edge (BO<sub>3</sub>), and face (BO<sub>4</sub>) sharing. Thorium polyhedra, BO<sub>3</sub> triangles and BO<sub>4</sub> tetrahedra are shown in yellow, green and cyan.

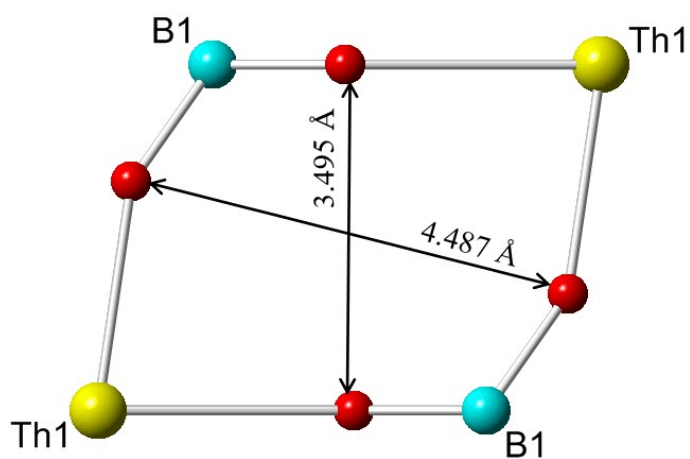

**Figure S8.** Four membered rings along the  $a$ -axis in the structure of  $\beta$ -ThB<sub>2</sub>O<sub>5</sub>.

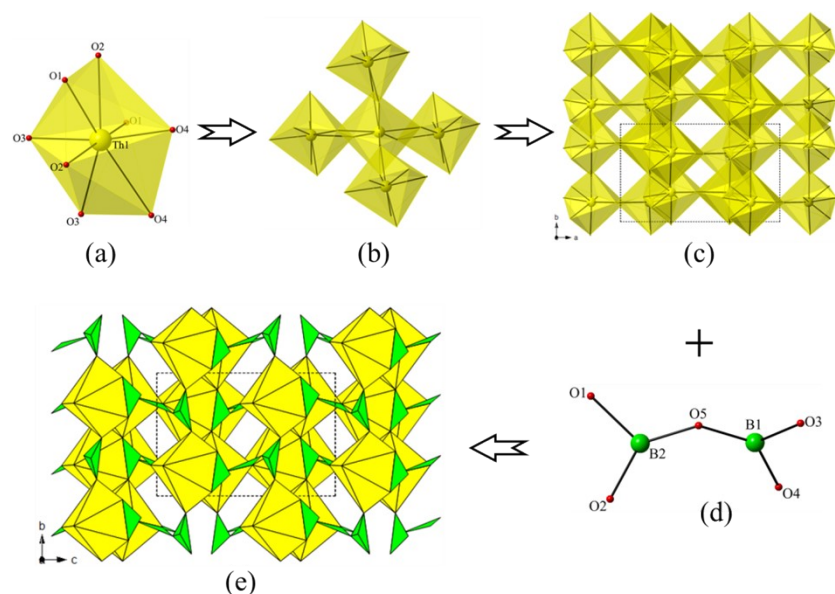

**Figure S9.** Representation of the  $\alpha$ - $\text{ThB}_2\text{O}_5$  structure. A one-capped distorted thorium pentagonal bipyramid (a), a four-fold Th-coordinated thorium polyhedron (b), the 3D thorium network structure along the  $b$ -axis (c), a  $\text{B}_2\text{O}_5$  dimer (d), the 3D thorium borate framework structure along the  $b$ -axis (e).  $\text{ThO}_8$  polyhedra and  $\text{BO}_3$  triangles are shown in yellow and green, O atoms are shown in red.

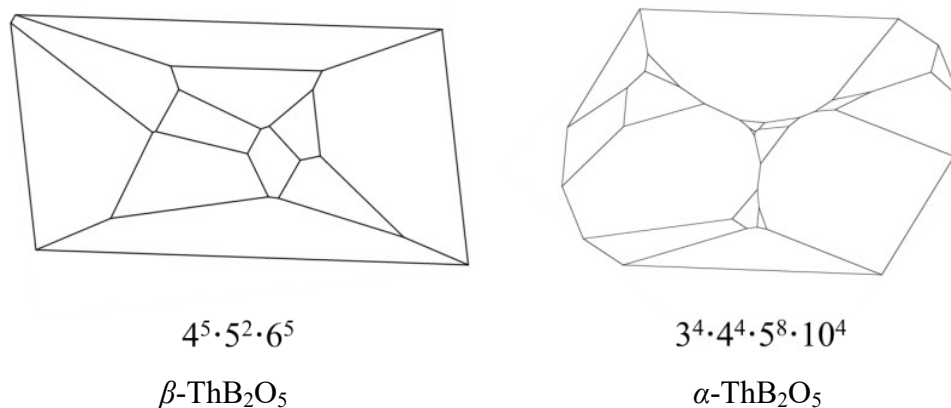

**Figure S10.** Schlegel projections of the Voronoi–Dirichlet polyhedral (VDP) with  $4^5 \cdot 5^2 \cdot 6^5$  ( $\beta$ - $\text{ThB}_2\text{O}_5$ ) and  $3^4 \cdot 4^4 \cdot 5^8 \cdot 10^4$  ( $\alpha$ - $\text{ThB}_2\text{O}_5$ ) combinatorial–topological types (CTTs).

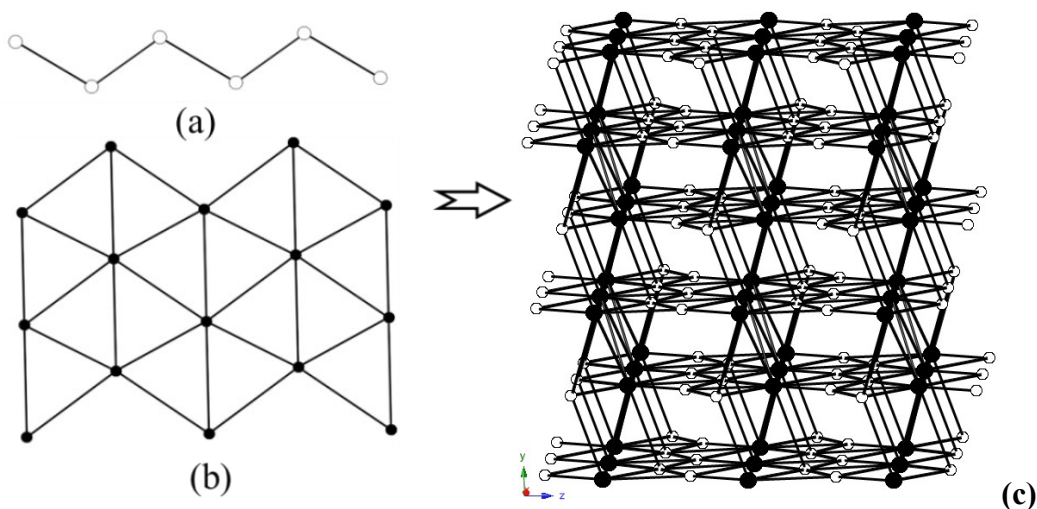

**Figure S11.** Cationic topology representation of  $\beta$ -ThB<sub>2</sub>O<sub>5</sub>. (a) A zigzag boron chain  $\cdots$ B1B2B1B2B1 $\cdots$  along the  $a$ -axis, (b) a 2D  $\{3^6\}$  Th-sheet parallel to the  $ab$ -plane, (c) Topological view of the 3D new 3-nodal cation network along  $a$ -axis with a point symbol of  $\{3^4, 4^{10}, 5^{10}, 6^4\} \{3^4, 4^{10}, 5^6, 6\} \{3^4, 4^4, 5^2\}$ . The Th cations are shown as 8-connected nodes with blackballs, B1 and B2 are 7 and 5-connected nodes as hollow balls.

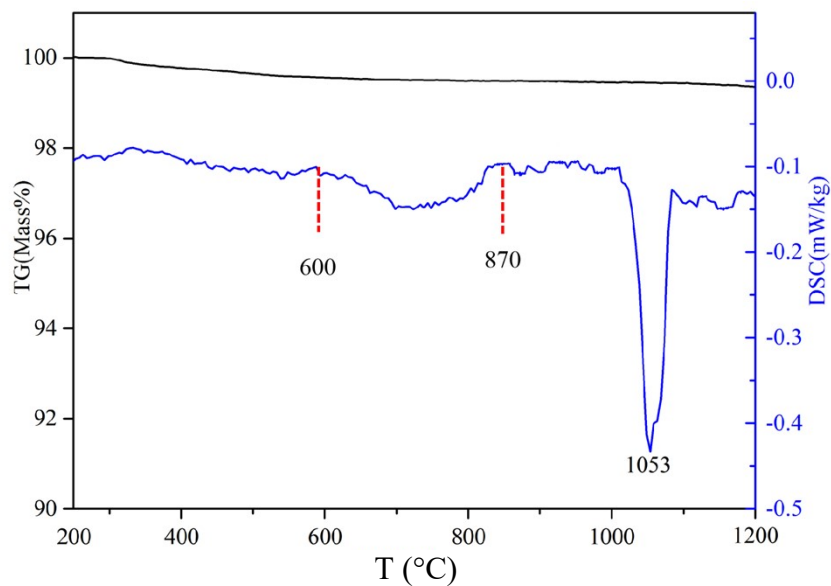

**Figure S12.** TG and DSC curves of  $\alpha$ -ThB<sub>2</sub>O<sub>5</sub> from 200 to 1200 °C.

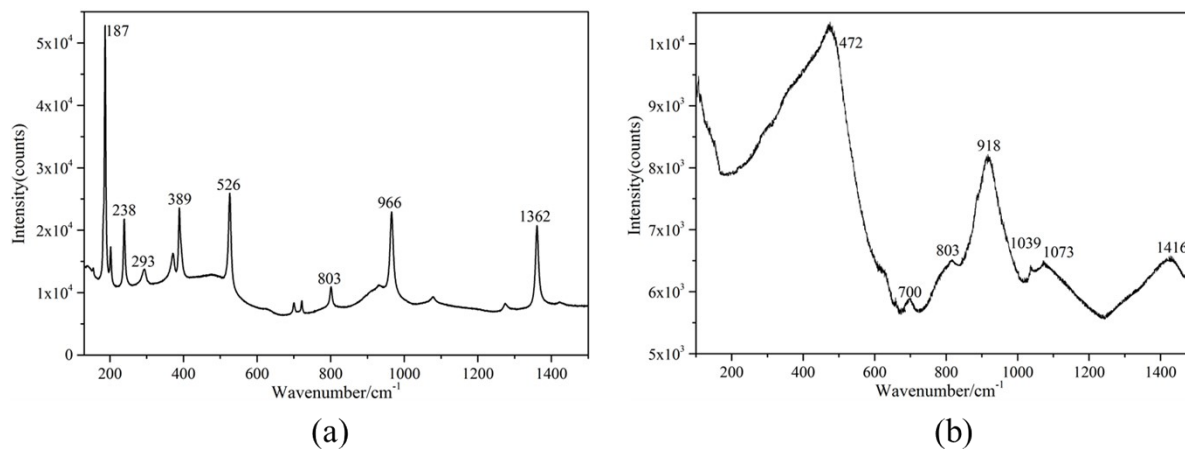

**Figure S13.** Raman spectra of compound  $\beta$ -ThB<sub>2</sub>O<sub>5</sub> (a) and  $\alpha$ -ThB<sub>2</sub>O<sub>5</sub> (b) presented in the range 100 to 1500  $\mu\text{m}$ .

**Table S2.** The lattice parameters of  $\alpha$ -ThB<sub>2</sub>O<sub>5</sub> and  $\beta$ -ThB<sub>2</sub>O<sub>5</sub> obtained by DFT studies. In parentheses we report the offset from the measured values.

|        | $\beta$ -ThB <sub>2</sub> O <sub>5</sub> | $\alpha$ -ThB <sub>2</sub> O <sub>5</sub> |
|--------|------------------------------------------|-------------------------------------------|
| A      | 4.239 (-0.014)                           | 11.643 (+0.098)                           |
| B      | 6.934 (+0.061)                           | 7.037 (+0.100)                            |
| C      | 6.339 (+0.015)                           | 10.258 (-0.005)                           |
| Alpaha | 90                                       | 90                                        |
| Betha  | 106.69 (+0.374)                          | 100.68 (-0.82)                            |
| Gamma  | 90                                       | 90                                        |
| Vol    | 178.47 (+1.03)                           | 825.96 (+20.52)                           |



**Table S3. Computed and measured IR bands positions. The frequencies are reported in cm<sup>-1</sup>**

1.

| $\beta$ -ThB <sub>2</sub> O <sub>5</sub> |              | $\alpha$ -ThB <sub>2</sub> O <sub>5</sub> |              |
|------------------------------------------|--------------|-------------------------------------------|--------------|
| computed                                 | experimental | computed                                  | experimental |
| 1411                                     | 1438,1385    | 1400                                      | 1414         |
| 1294                                     | 1268         | 1250, 1252                                | 1257         |
| 1078                                     | 1072         | 1028                                      | 1027         |
| 990,945,914                              | 928          | 634,630,618                               | 652          |
| 790                                      | 807          | 513,508,505                               | 529          |
| 715                                      | 735          |                                           |              |
| 628                                      | 652          |                                           |              |
| 562, 543                                 | 580,557      |                                           |              |
